# Supplementary material for: Surface protonic conduction in porous alkaline earth zirconate perovskites CaZrO3, SrZrO3, and BaZrO3
Source: Royal Society of Chemistry journal article supplement (doi:10.1039/d4ta04438j), 2024-01-01
Supplement: d4ta04438j1.pdf [file d4ta04438j1.pdf]

Electronic Supplementary Information

## **Surface Protonic Conduction in Porous Alkaline Earth Zirconate Perovskites CaZrO<sub>3</sub>, SrZrO<sub>3</sub>, and BaZrO<sub>3</sub>**

Jie Gu <sup>1</sup>, Xinwei Sun <sup>2</sup>, Lulu Jiang <sup>1</sup>, Zihan Zhang <sup>1</sup>, Truls Norby <sup>1,2\*</sup>, Donglin Han <sup>1,3,4,5\*</sup>

<sup>1</sup> College of Energy, Soochow University, No 1 Shizi Street, Gusu District, Suzhou 215006, China

<sup>2</sup> Centre for Materials Science and Nanotechnology, Department of Chemistry, University of Oslo, Gaustadalléen 21, NO-0349 Oslo, Norway

<sup>3</sup> Provincial Key Laboratory for Advanced Carbon Materials and Wearable Energy Technologies, Soochow University, No 1 Shizi Street, Gusu District, Suzhou 215006, China

<sup>4</sup> Jiangsu Key Laboratory of Advanced Negative Carbon Technologies, Soochow University, Suzhou 215123, China

<sup>5</sup> Light Industry Institute of Electrochemical Power Sources, Shahu Science & Technology Innovation Park, Suzhou 215638, China

\* Corresponding authors:

Truls Norby (truls.norby@kjemi.uio.no)

Donglin Han (dlhan@suda.edu.cn)

## 1. XRD analysis

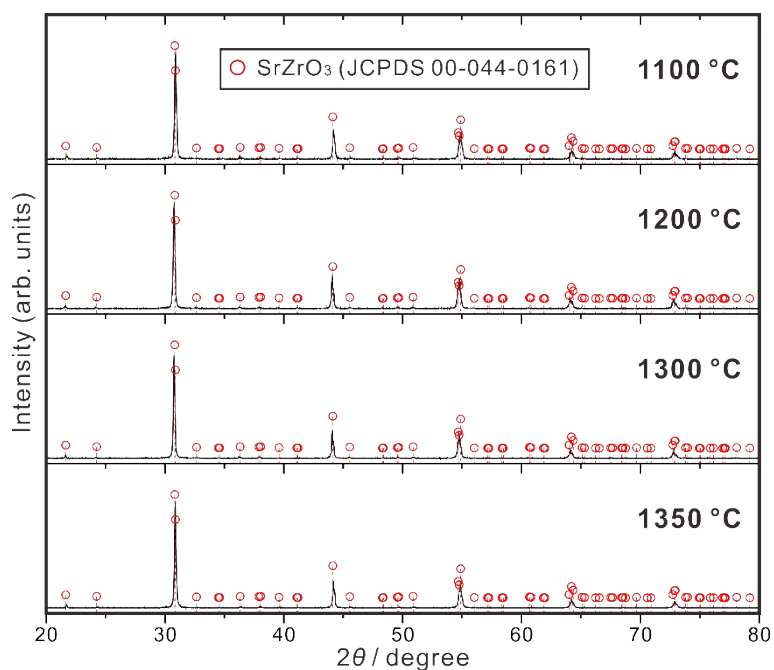

**Fig. S1** Room temperature powder XRD patterns of SrZrO<sub>3</sub> sintered at 1100, 1200, 1300, and 1350 °C for 24 h in ambient air.

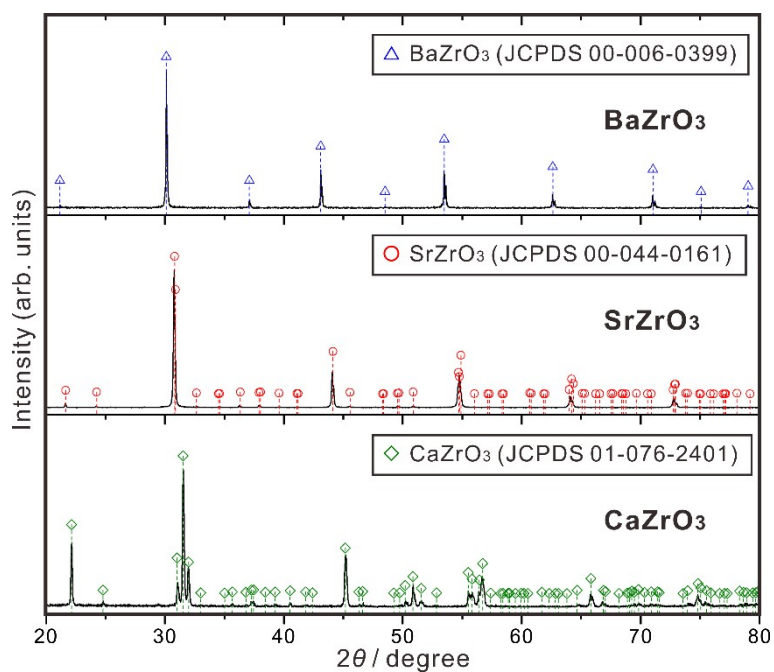

**Fig. S2** Room temperature powder XRD patterns of CaZrO<sub>3</sub>, SrZrO<sub>3</sub>, and BaZrO<sub>3</sub> sintered at 1300 °C for 24 h in ambient air.

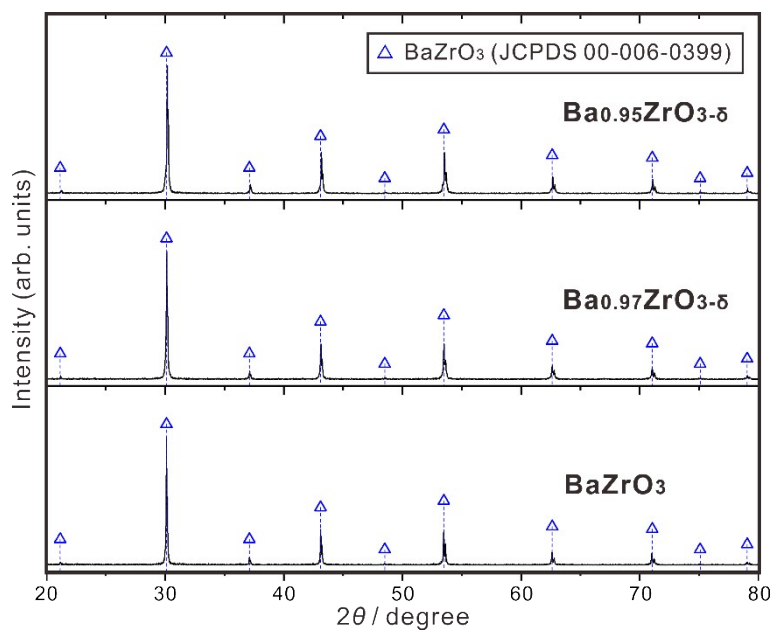

**Fig. S3** Room temperature powder XRD patterns of  $\text{Ba}_{0.95}\text{ZrO}_{3-\delta}$ ,  $\text{Ba}_{0.97}\text{ZrO}_{3-\delta}$ , and  $\text{BaZrO}_3$  sintered at 1300 °C for 24 h in ambient air.

## 2. XPS analysis

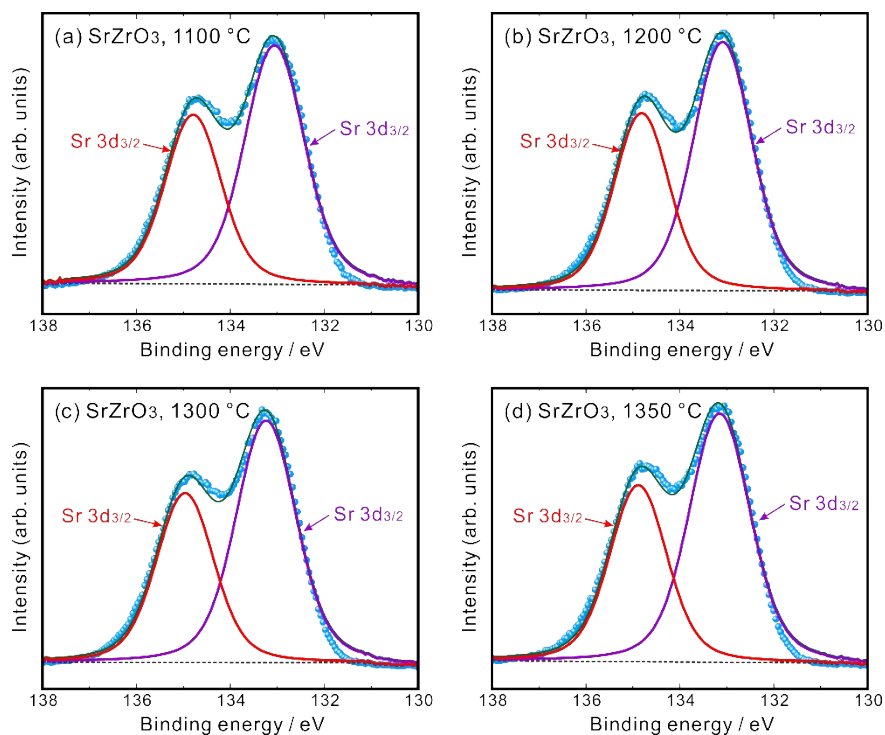

**Fig. S4** Sr 3d XPS spectra of  $\text{SrZrO}_3$  sintered at (a) 1100 °C, (b) 1200 °C, (c) 1300 °C, and (d) 1350 °C in ambient air.

### 3. Conductivity

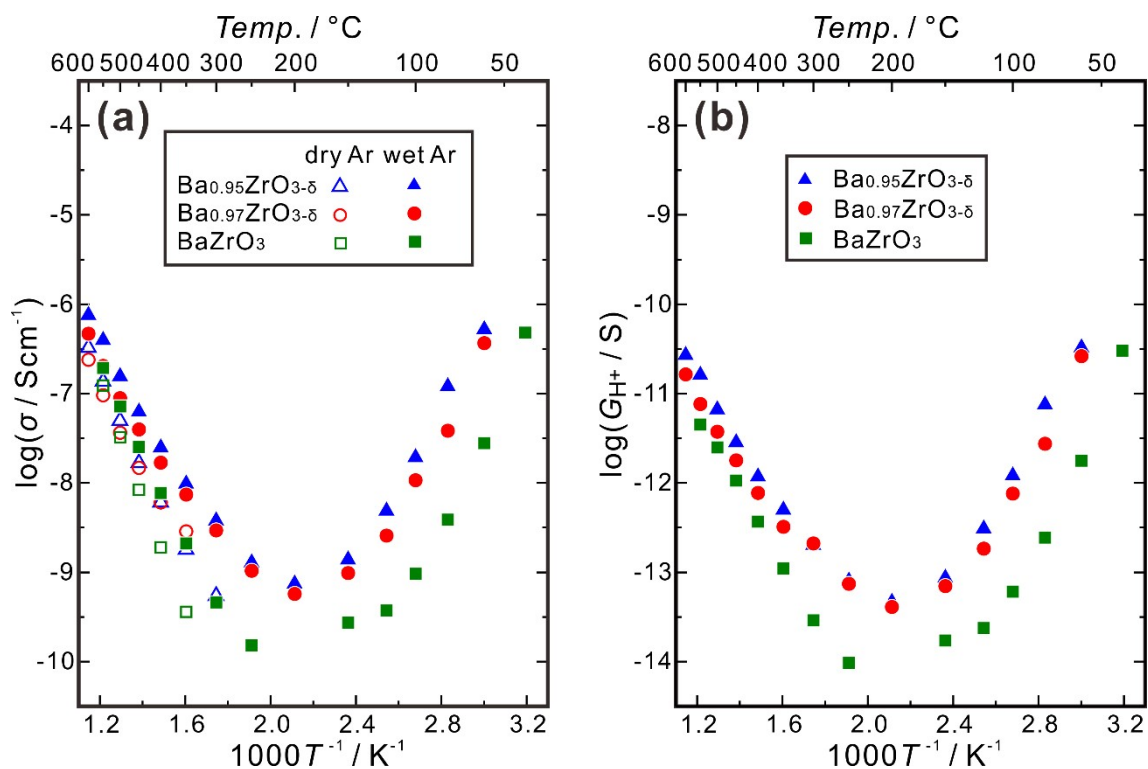

**Fig. S5** (a) Total conductivities and (b) surface protonic conductance of the porous samples of  $\text{Ba}_{0.95}\text{ZrO}_{3-\delta}$ ,  $\text{Ba}_{0.97}\text{ZrO}_{3-\delta}$  and  $\text{BaZrO}_3$  in dry and wet ( $p_{\text{H}_2\text{O}} = 0.04 \text{ atm}$ ) Ar atmospheres. All the samples were sintered at  $1300 \text{ }^{\circ}\text{C}$  for 24 h in ambient air.

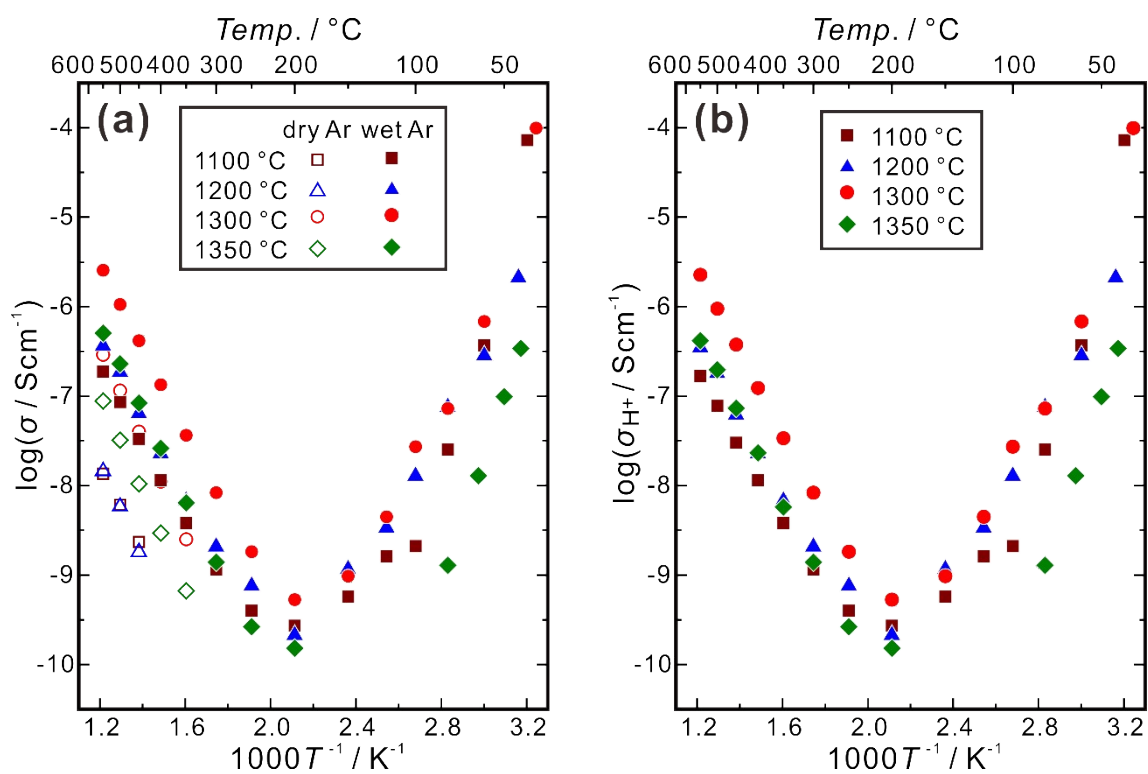

**Fig. S6** (a) Total conductivities of SrZrO<sub>3</sub> (sintered at 1100, 1200, 1300 and 1350 °C) in dry and wet ( $P_{H_2O} = 0.04$  atm) Ar atmospheres, and (b) surface protonic conductivity after subtraction of the dry conductivities.

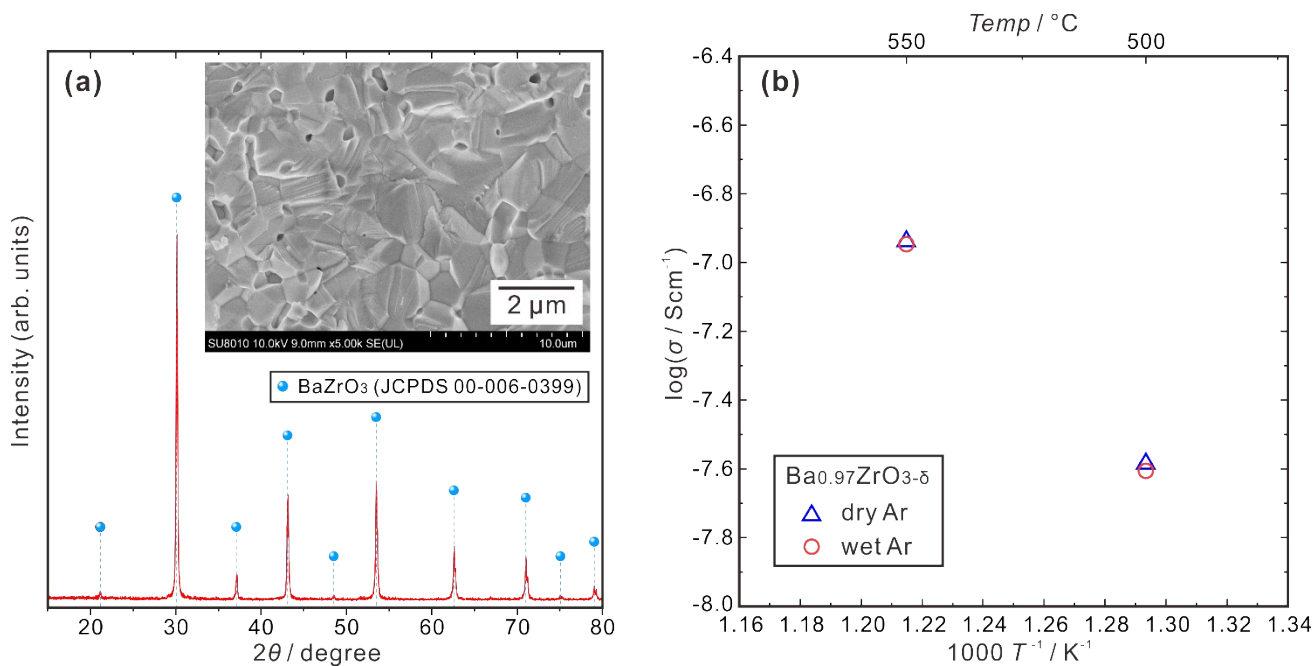

**Fig. S7** (a) XRD pattern and SEM image, and (b) total conductivities measured in dry and wet ( $p_{\text{H}_2\text{O}} = 0.03 \text{ atm}$ ) of  $\text{Ba}_{0.97}\text{ZrO}_{3-\delta}$  with relative density above 90% obtained by sintering at 1650 °C for 24 h. During the sintering process, the sample was covered with as-synthesized  $\text{Ba}_{0.97}\text{ZrO}_{3-\delta}$  powder to prevent evaporation of BaO.

**Table S1** Derived  $P_{\text{H}_2\text{O}}$  dependences and predicted preexponentials of surface protonic conductance within the chemisorbed water layer at  $P_{\text{H}_2\text{O}} = 1$  and 0.04 atm according to four models of dissociation and transport in cases of low coverage (Sun *et al.*, *Appl. Surf. Sci.*, 2023, **611**, 155590), for which molecular or dissociated chemisorption have the same parameters. Also included are predictions for full coverage, where there are no  $P_{\text{H}_2\text{O}}$  dependences, but differences between molecular or dissociated dominance. The predicted preexponentials are calculated based on a rough estimate of density of surface adsorption sites (i.e., terminating cations) and oxygen-oxygen distance for proton jumps that should be equally valid for perovskites as for binary oxides.

| Model Parameter                                               | cms-s<br>c ds-s    | cms-sa<br>c ds-sa   | cms-a<br>c ds-a     | cma-a               | cms-s              | c ds-s             | cms-sa               | c ds-sa            | cms-a              | c ds-a             | cma-a                |
|---------------------------------------------------------------|--------------------|---------------------|---------------------|---------------------|--------------------|--------------------|----------------------|--------------------|--------------------|--------------------|----------------------|
| $n$ in $G_{s,\text{H}^+0} \propto P_{\text{H}_2\text{O}}^n$   | 1/2                | 1                   | 3/2                 | 2                   | 0 (full coverage)  |                    |                      |                    |                    |                    |                      |
| $G_{s,\text{H}^+0}^0$ (SK), $P_{\text{H}_2\text{O}} = 1$ atm  | $2 \times 10^{-6}$ | $3 \times 10^{-9}$  | $3 \times 10^{-12}$ | $6 \times 10^{-15}$ | $1 \times 10^{-3}$ | $4 \times 10^{-4}$ | $1.5 \times 10^{-3}$ | $8 \times 10^{-4}$ | $1 \times 10^{-3}$ | $8 \times 10^{-4}$ | $1.5 \times 10^{-3}$ |
| $G_{s,\text{H}^+0}$ (SK), $P_{\text{H}_2\text{O}} = 0.04$ atm | $4 \times 10^{-7}$ | $1 \times 10^{-10}$ | $4 \times 10^{-13}$ | $1 \times 10^{-19}$ | $1 \times 10^{-3}$ | $4 \times 10^{-4}$ | $1.5 \times 10^{-3}$ | $8 \times 10^{-4}$ | $1 \times 10^{-3}$ | $8 \times 10^{-4}$ | $1.5 \times 10^{-3}$ |

**Table S2** Experimental preexponentials of surface protonic conductance within the chemisorbed water layer and the physisorbed layer at  $P_{\text{H}_2\text{O}} = 0.04$  atm.

| Conditions     | Type of conduction          | Sample Parameter | SZO-1100           | SZO-1200           | SZO-1300           | SZO-1350           | CZO-1300           | BZO-1300           | Ba <sub>0.97</sub> ZrO <sub>3-δ</sub> -1300 | Ba <sub>0.95</sub> ZrO <sub>3-δ</sub> -1300 |
|----------------|-----------------------------|------------------|--------------------|--------------------|--------------------|--------------------|--------------------|--------------------|---------------------------------------------|---------------------------------------------|
| High $T$ , wet | chemisorbed                 | $G_0$ / SK       | $5 \times 10^{-4}$ | $2 \times 10^{-3}$ | $5 \times 10^{-2}$ | $2 \times 10^{-2}$ | $4 \times 10^{-1}$ | $6 \times 10^{-4}$ | $6 \times 10^{-5}$                          | $2 \times 10^{-3}$                          |
| Low $T$ , wet  | 1 <sup>st</sup> physisorbed | $G_0$ / SK       | $10^{-21}$         |                    |                    |                    | -                  | $10^{-22}$         | $10^{-21}$                                  |                                             |
